# Supplementary material for: Prevalence of low central venous oxygen saturation in the first hours of intensive care unit admission and associated mortality in septic shock patients: a prospective multicentre study
Source: Springer Nature journal article supplement (doi:10.1186/s13054-014-0609-7), 2014-11-06
Supplement: MOESM4 [file 9779832]

## ***Additional file 4***

**Title:** Prevalence of low central venous oxygen saturation in the first hours of intensive care unit admission and associated mortality in septic shock patients: A prospective multicenter study.

**Authors:** Thierry Boulain, MD, Denis Garot, MD, Philippe Vignon, MD, Jean-Baptiste Lascarrou, MD, Arnaud Desachy, MD, Vlad Botoc, MD, Arnaud Follin, MD, Jean-Pierre Frat, MD, Frédéric Bellec, MD, Jean-Pierre Quenot, MD, PhD, Armelle Mathonnet, MD, Pierre-François Dequin, MD, PhD, Clinical Research in Intensive Care and Sepsis (CRICS) Group

**Corresponding author :** [thierry.boulain@chr-orleans.fr](mailto:thierry.boulain@chr-orleans.fr)

**Association between  $S_{cv}O_2$  and day-28 survival as assessed by LOWESS plot**

The  $S_{cv}O_2$  below 70% and other thresholds of initial  $S_{cv}O_2$  values determined by locally weighted scatterplot smoothing (LOWESS) plot were examined for their potential association with day-28 mortality.

**Figure E2:** Locally weighted scatterplot smoothing (LOWESS) plot of the association of day-28 survival probability and initial central venous oxygen saturation value (%).

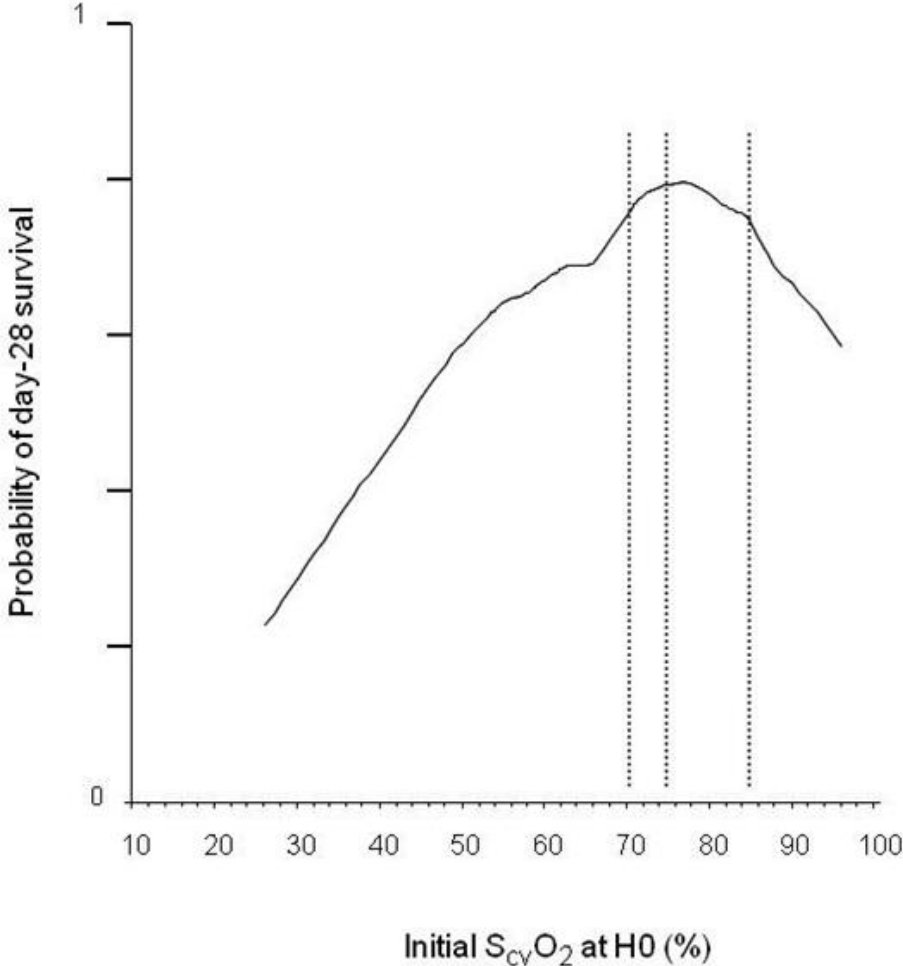

Legend: Vertical dashed lines indicate which thresholds of central venous oxygen saturation value were visually chosen to be examined for their potential association with day-28 mortality by univariate and multivariate analyses.
