# Supplementary material for: Prevalence of low central venous oxygen saturation in the first hours of intensive care unit admission and associated mortality in septic shock patients: a prospective multicentre study
Source: Springer Nature journal article supplement (doi:10.1186/s13054-014-0609-7), 2014-11-06
Supplement: MOESM6 [file 9779832]

## ***Additional file 6***

**Title:** Prevalence of low central venous oxygen saturation in the first hours of intensive care unit admission and associated mortality in septic shock patients: A prospective multicenter study.

**Authors:** Thierry Boulain, MD, Denis Garot, MD, Philippe Vignon, MD, Jean-Baptiste Lascarrou, MD, Arnaud Desachy, MD, Vlad Botoc, MD, Arnaud Follin, MD, Jean-Pierre Frat, MD, Frédéric Bellec, MD, Jean-Pierre Quenot, MD, PhD, Armelle Mathonnet, MD, Pierre-François Dequin, MD, PhD, Clinical Research in Intensive Care and Sepsis (CRICS) Group

**Corresponding author :** [thierry.boulain@chr-orleans.fr](mailto:thierry.boulain@chr-orleans.fr)

## Evolution of central venous oxygen saturation from H0 to H6

**Figure E3:**

Evolution of central venous oxygen saturation from H0 to H6

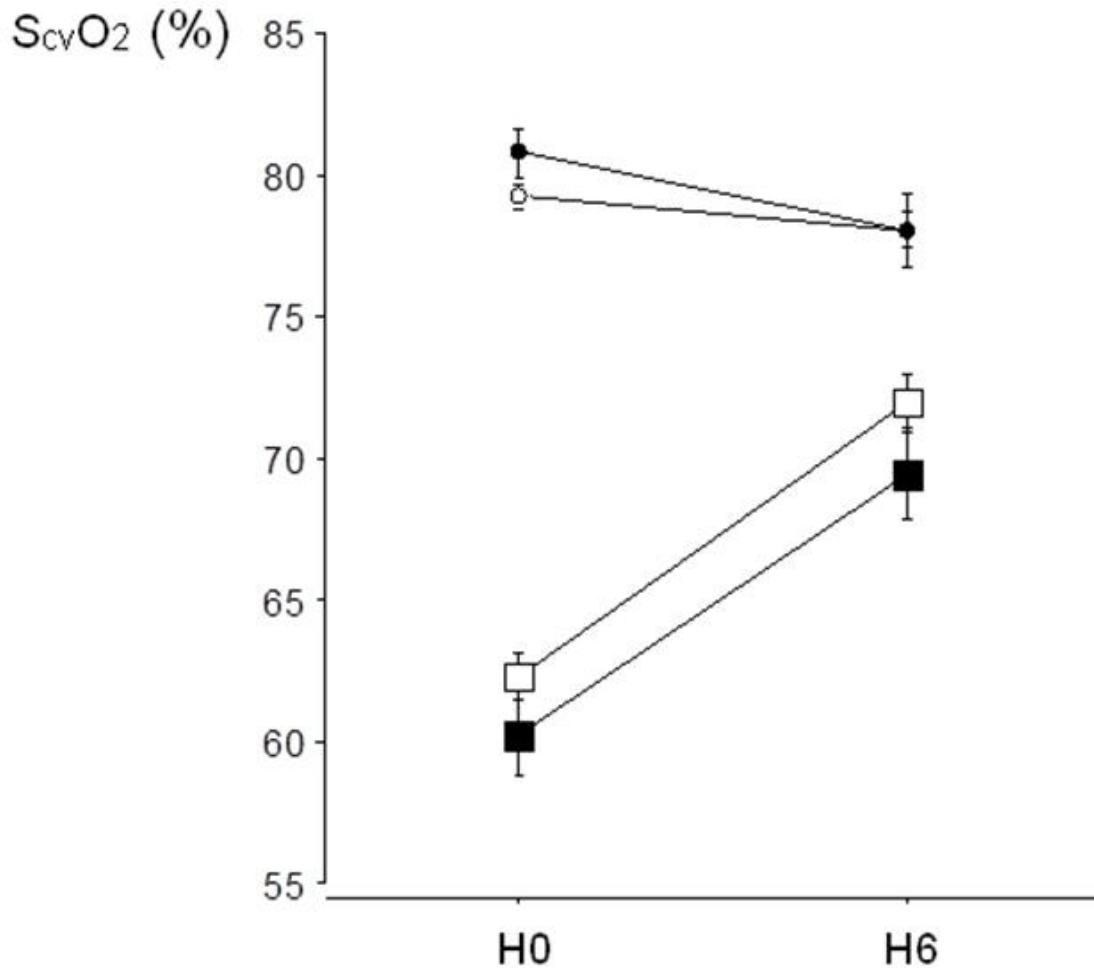

Legend: *Definition of abbreviations:* ScvO2 = central venous oxygen saturation; Circles represent patients with ScvO2 at H0 above 70%; Squares represent patients with ScvO2 at H0 below 70%; Empty and black symbols represent survivors and non-survivors at day 28, respectively. Bars represent standard errors.

### Figure E4:

Survival curve and death rate (%) at day 28 according to lactate level and  $S_{cv}O_2$  at the sixth hour

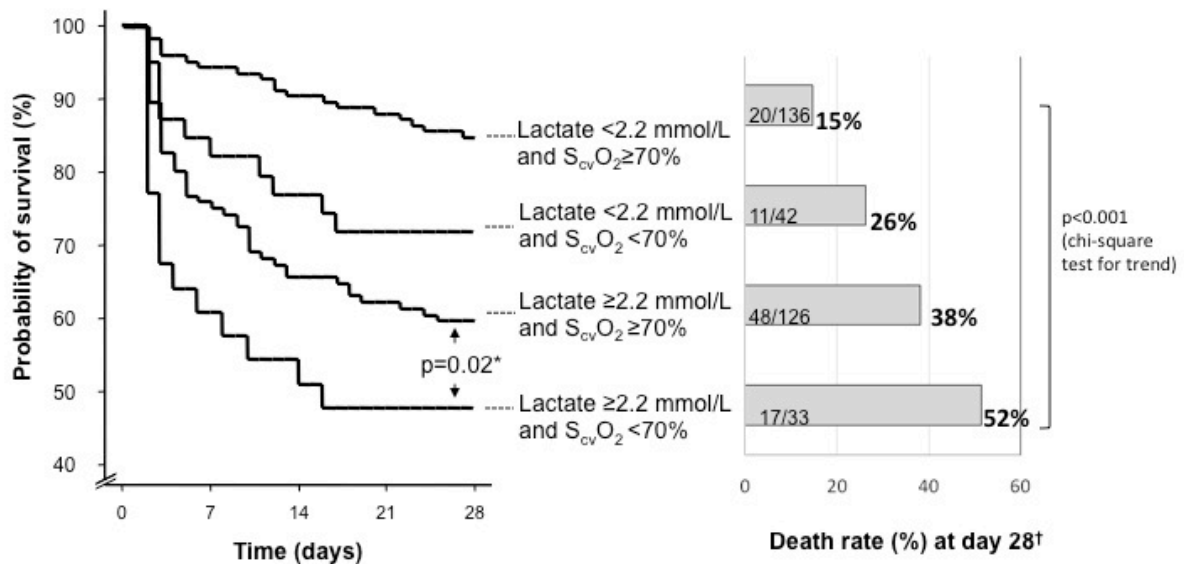

Legend: *Definition of abbreviations:*  $ScvO_2$  = central venous oxygen saturation; The left part of the figure shows survival curves in 4 patients' subgroups according to their lactate concentration and  $S_{cv}O_2$  at H6. The right part of the figure shows the day-28 death rate in each subgroup. Numbers inside the bars are number of nonsurvivors/total number of patients in each subgroup.

<sup>a</sup>: Unadjusted pair comparison of survival curves reached statistical significance between  $S_{cv}O_2$  below or above 70% at H6 in the subset of patients with initial lactate level above 2.2 mmol/L ( $p=0.02$  by log rank test).

<sup>b</sup>: There was no significant difference in crude death rate at day-28 among the 4 groups (chi-squared test).. However, there was a significant global trend towards higher death rate from the condition with normal lactate and  $S_{cv}O_2$  to the condition with high lactate and low  $S_{cv}O_2$  ( $p<0.001$  by Cochran-Armitage test).

**Figure E5:**

Survival curve and death rate (%) at day 28 according to lactate clearance and  $S_{cv}O_2$  at the sixth hour

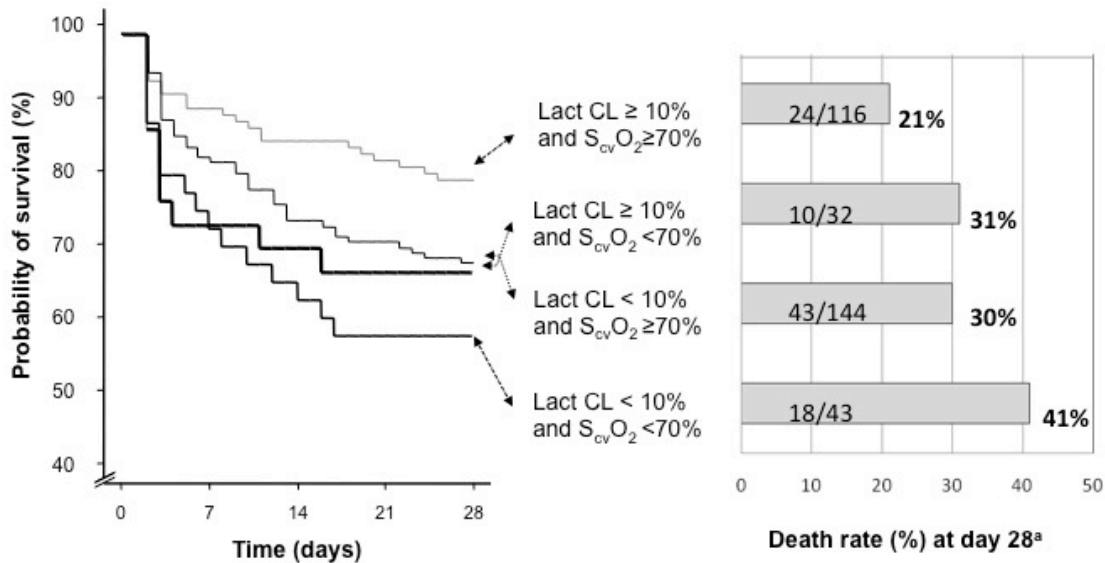

**Legend:**

When classifying the patients in 4 groups according to their lactate clearance (below or above 10%) and to their  $S_{cv}O_2$  at H6 (below or above 70%), we observed no significant difference in pair comparisons of survival curves.

<sup>a</sup>: There was no significant difference in crude death rate at day-28 among the 4 groups (chi-squared test). However, there was a significant global trend towards higher death rate from the condition with good lactate clearance and  $S_{cv}O_2 \geq 70\%$  at H6 to the condition with bad lactate clearance and low  $S_{cv}O_2$  ( $p=0.011$  by Cochran-Armitage test).
