# Supplementary material for: Prevalence of low central venous oxygen saturation in the first hours of intensive care unit admission and associated mortality in septic shock patients: a prospective multicentre study
Source: Springer Nature journal article supplement (doi:10.1186/s13054-014-0609-7), 2014-11-06
Supplement: MOESM7 [file 9779832]

## ***Additional file 7***

**Title:** Prevalence of low central venous oxygen saturation in the first hours of intensive care unit admission and associated mortality in septic shock patients: A prospective multicenter study.

**Authors:** Thierry Boulain, MD, Denis Garot, MD, Philippe Vignon, MD, Jean-Baptiste Lascarrou, MD, Arnaud Desachy, MD, Vlad Botoc, MD, Arnaud Follin, MD, Jean-Pierre Frat, MD, Frédéric Bellec, MD, Jean-Pierre Quenot, MD, PhD, Armelle Mathonnet, MD, Pierre-François Dequin, MD, PhD, Clinical Research in Intensive Care and Sepsis (CRICS) Group

**Corresponding author :** [thierry.boulain@chr-orleans.fr](mailto:thierry.boulain@chr-orleans.fr)

## **Roles of respiratory condition, haemoglobin, and body temperature**

### ***Role of initial respiratory condition***

Initial arterial partial pressure of oxygen ( $P_aO_2$ ) and  $S_{cv}O_2$  were positively albeit weakly correlated ( $r^2=0.13$ ;  $p<0.0001$ ). The median initial  $PaO_2$  was 98 mmHg (IQR: 79-138). Patients with initial  $P_aO_2$  below the median value had a higher prevalence of  $S_{cv}O_2$  value below 70% than patients with  $PaO_2$  above or equal to median value (40% [72/179] vs. 21% [39/184], respectively;  $p<0.0001$ ). The one hundred patients who were breathing spontaneously at H0 had a lower  $P_aO_2$  ( $100\pm 38$  mmHg) than the 263 patients already intubated ( $129\pm 77$  mmHg) ( $p=0.0003$ ). Spontaneously breathing patients had more frequently an initial  $S_{cv}O_2$  value below 70% compared to already intubated patients (47% vs. 24%, respectively;  $p=0.0001$ ). However, in ventilated patients an initial  $S_{cv}O_2$  below 70% remained significantly linked to day-28 over mortality by multivariate analysis (OR=2.36 [1.16-4.79]).

### ***Role of hemoglobin concentration***

The hemoglobin concentration (Hb) at the exact time (within one hour) of inclusion was known for 297 patients (82%). There was a weak but significant positive correlation between initial Hb and initial  $S_{cv}O_2$  in these patients ( $r^2=0.03$ ;  $p=0.002$ ). The median initial Hb was 11 g/dL (IQR: 9.6-12.8). Patients with initial Hb below the median value had a higher prevalence of  $S_{cv}O_2$  value below 70% than patients with Hb above or equal to median value (39% [60/152] vs. 21% [31/145], respectively;  $p<0.0001$ ).

In multivariate analysis, initial  $S_{cv}O_2$  below 70% was significantly linked to day-28 mortality in the subgroup of patients with Hb below 11 g/dL (OR=2.58 [1.14-5.83]) but not in patients with Hb above this value (OR=1.79 [0.53-6.04]).

### ***Role of initial body temperature***

We found no correlation between initial body temperature and initial  $S_{cv}O_2$  value ( $r^2=0.003$ ) and no relation between the changes in both parameters between H0 and H6 ( $r^2=0.0004$ ). Although in multivariate analysis a high body temperature appeared to independently protect against day-28 death (OR=0.78 [0.62-0.98] for each 1-

Celsius degree increase in body temperature), an initial  $S_{cv}O_2$  below 70% was significantly associated with day-28 mortality either when initial body temperature was below (OR=3.03; 95%CI: 1.07-8.55; p= 0.036) or above (OR=2.91; 95%CI: 1.00-8.44; p= 0.049) the median value of 37.2°C .
